# Supplementary material for: Efficacy of Organ Preservation Strategy by Adjuvant Chemoradiotherapy after Non-Curative Endoscopic Resection for Superficial SCC: A Multicenter Western Study
Source: MDPI journal article supplement (doi:10.3390/cancers15030590), 2023-01-18
Supplement: s1 [file s1]

## S1

### *Center and period bias assessment*

The endoscopic centers were divided into three groups (only EMR, only ESD, or EMR and ESD). The grouping was not an independent predictor of recurrence-free survival ( $P = 0.316$ ). The recurrence-free survival rate within the third tertile of the inclusion period was similar in each tertile period ( $P = 0.284$ ) (**Supplementary figure 1**).

### *Complications after endoscopic resection*

The overall complication rate was 8% and was similar in the ESD (12.1%) and EMR (4.2%) groups ( $P = 0.089$ ). Intraoperative perforations occurred in six procedures (one EMR, five ESD). In all cases the treatment was conservative, using a self-expandable metallic stent and antibiotics. Delayed bleeding occurred in 1.5% of procedures (2/137). During follow-up, the rate of postoperative strictures was 17.5% (24/137). Patients with strictures were successfully treated by endoscopy, and any patient with a refractory stricture required secondary surgery.

### *Local recurrence*

The rate of local recurrence was 21.1% in the EMR group and 3% in the ESD group and this difference was statistically significant ( $P = 0.016$ ) (Supplementary Table 2 and 3). In univariable analyses resection by EMR ( $P = 0.016$ ), piecemeal resection ( $P = 0.012$ ), and non-tumor-free lateral margin ( $P < 0.001$ ) were associated with local recurrence. However, in the multivariable analysis no factor was significantly associated with local recurrence (Supplementary Table 3).

## S2

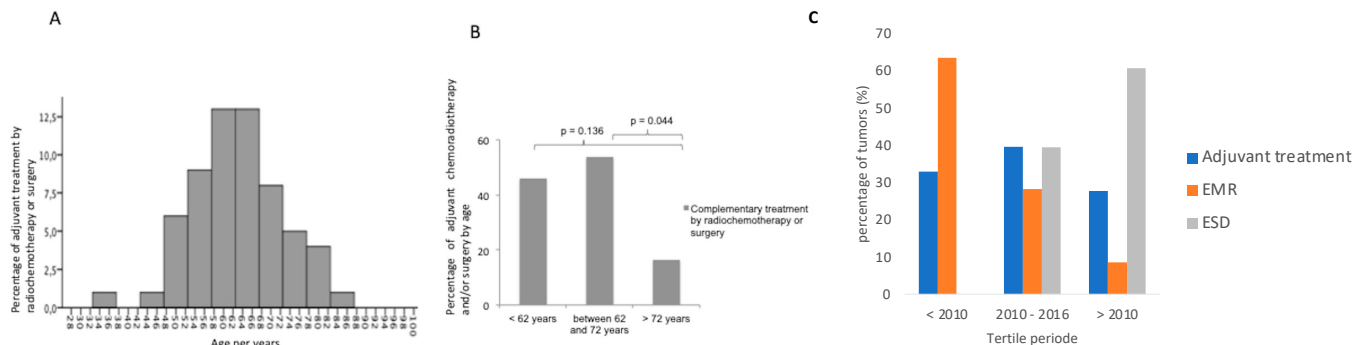

**Supplementary Figure S1.** Adjuvant chemoradiotherapy and/or surgery by age. Panel A: Percentage of adjuvant chemoradiotherapy and/or surgery by age; Panel B: Comparison of rates of adjuvant chemoradiotherapy and/or surgery by age group (< 62 years; between 62 and 72 years; and > 72 years). Panel C: Comparison of rates of adjuvant chemoradiotherapy, and endoscopic resection by EMR or ESD.

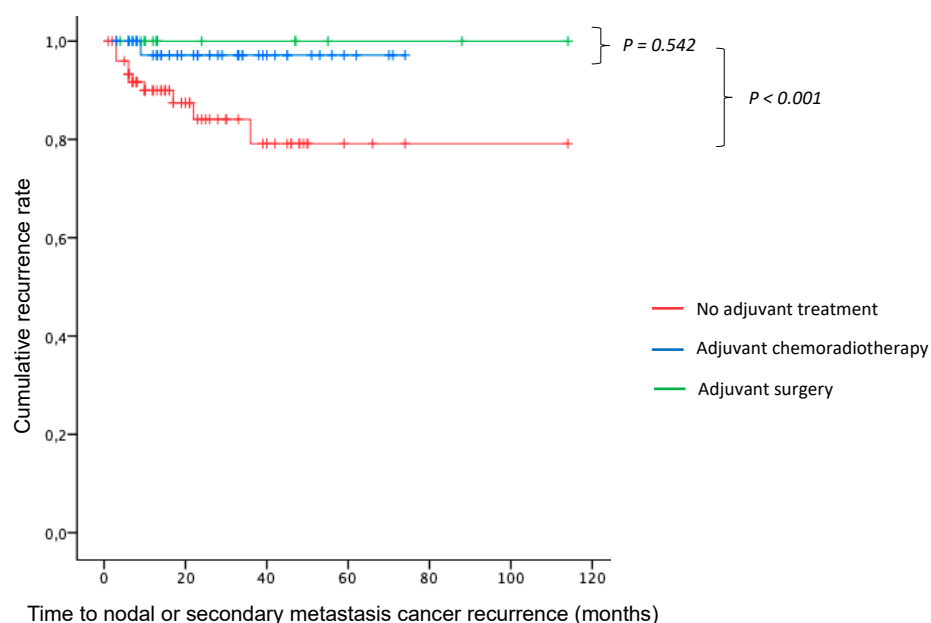

**Supplementary Figure S2.** Nodal or metastatic recurrence-free survival rates in patients with tumors invading the muscularis mucosae (pT1a-m3) or the submucosa (pT1b-Sm) with and without adjuvant chemoradiotherapy and/or surgery.

**Supplementary Table S1.** Number of EMR and ESD procedures performed per center.

| Centre, n(%) | ESD group (n=66) | EMR group (n=71) |
|--------------|------------------|------------------|
| 1            | 5(7.6)           | 6(8.5)           |
| 2            | 11(16.7)         | 0(0.0)           |
| 3            | 0(0.0)           | 8(11.3)          |
| 4            | 0(0.0)           | 10(14.1)         |
| 5            | 16(24.2)         | 1(1.4)           |
| 6            | 9(13.6)          | 0(0.0)           |
| 7            | 3(4.5)           | 0(0.0)           |
| 8            | 0(0.0)           | 11(15.5)         |
| 9            | 3(4.5)           | 34(47.9)         |
| 10           | 17(25.8)         | 0(0.0)           |
| 11           | 2(3.0)           | 1(1.4)           |

ESD, endoscopic submucosal dissection; EMR, endoscopic mucosal resection.

**Supplementary Table S2.** Comparisons of the EMR and ESD groups were performed in intention-to-treat, choice between EMR or ESD was decided before to start the endoscopic resection.

|                                                          | EMR group (n = 71) | ESD group (n = 66) | P-value* |
|----------------------------------------------------------|--------------------|--------------------|----------|
| Male n (%)                                               | 57 (80.3)          | 46 (69.7)          | 0.152    |
| Mean age (years, (range))                                | 63.6 (35-87)       | 64.1 (44-90)       | 0.189    |
| Median size (mm, (range))                                | 15.0 (3.0-30.0)    | 35.7 (8.0-90.0)    | <0.001   |
| Tumor circumference of the esophageal lumen > 1/3 n (%)  | 34 (47.9)          | 50 (75.8)          | 0.001    |
| Piecemeal resection n (%)                                | 48 (67.6)          | 2 (3.0)            | <0.001   |
| Lateral margin-free cancer (%) (R0; R1; Rx) <sup>a</sup> | (14.1; 18.3; 67.6) | (90.9; 6.1; 3.0)   | <0.001   |
| Tumor infiltration depth m3-sm1 n (%)                    | 48 (67.6)          | 43 (65.2)          | 0.761    |

|                                                              |              |             |        |
|--------------------------------------------------------------|--------------|-------------|--------|
| Adjuvant treatment by chemoradiotherapy or/and surgery n (%) | 30 (42.3)    | 31 (47.0)   | 0.579  |
| Mean follow-up (months, (range))                             | 41.4 (1-135) | 17.6 (3-55) | <0.001 |

ESD, endoscopic submucosal dissection; EMR, endoscopic mucosal resection; m3, cancer invading the muscularis mucosae, sm1: cancer invading the submucosa. \*Univariate analyses were carried out by chi-squared test for qualitative variables. For tumor size and age, <sup>a</sup> univariate t-test was used. <sup>a</sup> Lateral margins were considered R0 for tumor-free margins, R1 for non-tumor-free margins and Rx when the pathology was not evaluable, for example due to piecemeal resection.

**Supplementary Table S3.** Results according to local cancer recurrence during the follow-up.

|                                                         | Local cancer recurrence |                 | Univariate analysis  |
|---------------------------------------------------------|-------------------------|-----------------|----------------------|
|                                                         | Yes (n =17)             | No (n =120)     | P-value <sup>1</sup> |
| Male n (%)                                              | 12 (70.6)               | 91 (75.8)       | 0.407                |
| Mean age, (years, (range))                              | 65.7 (51-78)            | 63.6 (35-90)    | 0.074                |
| Median tumor size, (mm, (range))                        | 20.0 (10.0-40.0)        | 25.0 (3.0-90.0) | 0.210                |
| Tumor circumference of the esophageal lumen > 1/3 n (%) | 8 (47.1)                | 76 (63.3)       | 0.278                |
| EMR resection n (%)                                     | 15 (88.2)               | 56 (46.7)       | 0.016                |
| Piecemeal resection n (%)                               | 12 (70.6)               | 38 (31.7)       | 0.012                |
| Tumor infiltration depth > Sm1 n (%)                    | 6 (35.3)                | 40 (33.3)       | 0.854                |
| Differentiation G2 and G3 <sup>‡</sup> , n (%)          | 4 (23.5)                | 38 (31.7)       | 0.696                |
| Lymphovascular invasion, n (%)                          | 1 (5.9)                 | 18 (15.0)       | 0.397                |
| R1 or Rx <sup>a</sup> lateral margins n (%)             | 17 (100.0)              | 50 (24.2)       | <0.001               |
| Adjuvant treatment by chemoradiotherapy n (%)           | 5 (29.4)                | 56 (46.7)       | 0.126                |
| Median follow-up (months, (range))                      | 46.0 (9-135)            | 20.5 (1-115)    | 0.074                |

CI, confidence interval; EMR, endoscopic mucosal resection; m3, cancer invading the muscularis mucosae, sm, cancer invading the submucosa; R1, margin not tumor free; SCC, squamous cell carcinoma. <sup>a</sup> R1 for non-tumor-free margins and Rx when the pathology was not evaluable, for example, due to piecemeal resection. <sup>1</sup> Univariate analyses were carried out using the log-rank test for qualitative variables. For age and tumor size, a univariate Cox model was used. All significant factors, together with those of borderline significance ( $P < 0.2$ ), were included in the multivariate analysis, which used the Cox proportional hazards model. In the multivariate models, only variables with a  $P < 0.05$  were retained.

**Supplementary Table S4.** Characteristics of adjuvant chemoradiotherapy and/or surgery.

|                            | Complementary treatment    |                  | Univariate analysis |
|----------------------------|----------------------------|------------------|---------------------|
|                            | Chemoradiotherapy (n = 46) | surgery (n = 15) | P value*            |
| Male, n (%)                | 36 (78.3)                  | 11 (73.3)        | 0.730               |
| Age, mean (range), years   | 63.8 (35-83)               | 60.0 (44-81)     | 0.190               |
| ASA score $\geq 3$ , n (%) | 24 (52.2)                  | 8 (53.3)         | 0.938               |

|                                                |           |              |       |
|------------------------------------------------|-----------|--------------|-------|
| Tumor size, median (range), mm                 | 25 (5-65) | 30 (10-81.7) | 0.022 |
| EMR resection, n (%)                           | 24 (52.2) | 6 (40.0)     | 0.413 |
| Piece-meal resection, n(%)                     | 15 (32.6) | 4 (26.7)     | 0.757 |
| Tumor infiltration depth m3–sm1, n (%)         | 27 (58.7) | 7 (46.7)     | 0.415 |
| Differentiation G2 and G3 <sup>‡</sup> , n (%) | 17 (37.0) | 5 (33.3)     | 0.800 |
| Lymphovascular invasion, n (%)                 | 9 (19.6)  | 2 (13.3)     | 0.716 |
| Local recurrence cancer, n (%)                 | 5 (10.9)  | 0 (0.0)      | 0.321 |

ASA, American Society of Anesthesiologists; EMR, endoscopic mucosal resection; m3, invasive carcinoma limited to the muscularis mucosae; sm, invasive carcinoma limited to the submucosa. \*Univariate analyses were carried out by chi-squared test for qualitative variables. For age and tumor size, a univariate t-test was used. For local recurrence, a univariate Cox model was used. <sup>‡</sup>G2 was moderately differentiated and G3 was poorly differentiated.

**Supplementary Table S5.** Characteristics of adjuvant chemoradiotherapy.

|                                                | Adjuvant treatment by chemoradiotherapy |              | Univariate analysis |
|------------------------------------------------|-----------------------------------------|--------------|---------------------|
|                                                | Yes (n = 46)                            | No (n = 76)  | P value*            |
| Male, n (%)                                    | 36 (78.3)                               | 56 (73.7)    | 0.570               |
| Age, mean (range), years                       | 63.8 (35-83)                            | 64.7 (44-90) | 0.886               |
| ASA score ≥3, n (%)                            | 24 (52.2)                               | 39 (51.3)    | 0.927               |
| History of head-and-neck cancer n (%)          | 19 (41.3)                               | 28 (36.8)    | 0.624               |
| Tumor size, median (range), mm                 | 25 (5-65)                               | 20 (3-90)    | 0.861               |
| EMR resection, n (%)                           | 24 (52.2)                               | 6 (40.0)     | 0.413               |
| Piece-meal resection, n(%)                     | 15 (32.6)                               | 31 (40.8)    | 0.366               |
| Tumor infiltration depth m3–sm1, n (%)         | 27 (58.7)                               | 57 (75.0)    | 0.059               |
| Differentiation G2 and G3 <sup>‡</sup> , n (%) | 17 (37.0)                               | 20 (26.3)    | 0.215               |
| Lymphovascular invasion, n (%)                 | 9 (19.6)                                | 8 (10.5)     | 0.162               |

ASA, American Society of Anesthesiologists; EMR, endoscopic mucosal resection; m3, invasive carcinoma limited to the muscularis mucosae; sm, invasive carcinoma limited to the submucosa. \*Univariate analyses were carried out by chi-squared test for qualitative variables. For age and tumor size, a univariate t-test was used. <sup>‡</sup>G2 was moderately differentiated and G3 was poorly differentiated.

**Supplementary Table S6.** Risk factors associated with nodal or distal metastasis recurrence during.

|  | Nodal or secondary metastasis cancer recurrence | Univariate analysis | Multivariate analysis |
|--|-------------------------------------------------|---------------------|-----------------------|
|--|-------------------------------------------------|---------------------|-----------------------|

|                                                         | Yes (n =11)     | No (n =111)     | P-value <sup>1</sup> | Hazard ratio (95% CI) |
|---------------------------------------------------------|-----------------|-----------------|----------------------|-----------------------|
| Male n (%)                                              | 8 (75.7)        | 84 (72.7)       | 1.000                |                       |
| Mean age, (years, (range))                              | 70.2 (56-83)    | 63.8 (35-90)    | 0.030                | 1.083(1.015-1.156)    |
| History of head-and-neck cancer n (%)                   | 4 (36.4)        | 43 (38.7)       | 1.000                |                       |
| Median tumor size, (mm, (range))                        | 20.0 (7.0-71.5) | 25.0 (3.0-90.0) | 0.478                |                       |
| Tumor circumference of the esophageal lumen > 1/3 n (%) | 4 (36.4)        | 69 (62.2)       | 0.115                |                       |
| EMR resection n (%)                                     | 7 (63.6)        | 58 (52.3)       | 0.470                |                       |
| Piecemeal resection n (%)                               | 6 (54.5)        | 40 (36.0)       | 0.328                |                       |
| R1 or Rx <sup>a</sup> lateral margins, n (%)            | 6 (54.5)        | 54 (48.6)       | 0.709                |                       |
| Rx <sup>a</sup> depth margins, n (%)                    | 3 (27.3)        | 18 (16.2)       | 0.400                |                       |
| Tumor infiltration depth > Sm1 n (%)                    | 6 (54.5)        | 32 (28.8)       | 0.095                | 4.446(1.286-15.515)   |
| Differentiation G2 and G3 <sup>‡</sup> , n (%)          | 6 (54.5)        | 31 (30.1)       | 0.171                |                       |
| Lymphovascular invasion, n (%)                          | 1 (9.1)         | 16 (15.8)       | 1.000                |                       |
| No adjuvant treatment by chemoradiotherapy n (%)        | 1 (9.1)         | 45 (40.5)       | 0.051                | 8.072(1.006-64.802)   |
| Median follow-up (months, (range))                      | 34.0 (9-112)    | 23.0 (1-135)    | 0.180                |                       |

CI, confidence interval; EMR, endoscopic mucosal resection; sm1, cancer invading the submucosa; R1, margin not tumor free. <sup>a</sup> R1 for microscopic margins positive for tumor and Rx when the pathology was not evaluable, for example due to piecemeal resection and/or coagulation artifacts. <sup>1</sup> Univariate analyses were carried out by log-rank test for qualitative variables. For age and tumor size, a univariate Cox model was used. All significant factors, together with those of borderline significance ( $P < 0.2$ ), were included in the multivariate analyses, which used the Cox proportional hazards model. In the multivariate models, only variables with a  $P < 0.05$  were included.
